# Supplementary material
Source: PubMed Central journal article supplement (PMC5373756)
Supplement: ACI-08-0108-s001.pdf [file ACI-08-0108-s001.pdf]

<https://doi.org/10.4338/ACI-2016-08-RA-0139>

## Appendix A: The Survey Questionnaire

# Help us understand how the OpenMRS relationship feature is used!

Implementing

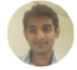

**surangak** Suranga Kasthurirathne Community Manager, APAC Region

Mar 18

Hi everyone! @terry , @burke and I need your help! We're trying to understand how people use the OpenMRS relationship feature for their work. So if you're an implementer who knows what an implementation has done with relationships, and how they're using it for their work, please do take a minute to answer the following four questions for us!!!

## Relationships in OpenMRS

We're interested in how you are using relationships within OpenMRS. If you have access to your database, we've included SQL that you can run to get the answers from your system.

Your contact details (name/email?)

Short answer text

What implementation are you reporting on?

Short answer text

What relationship types do you currently use? Please list your relationship types.

```
SELECT a_is_to_b, b_is_to_a, description FROM relationship_type;
```

Long answer text

How many relationships have you created?

```
SELECT COUNT(*) FROM relationship;
```

Short answer text

What value does having relationships in OpenMRS provide for your implementation?

Who uses these data? Are relationships important for any workflows? What do providers think about them?

Long answer text

## Appendix B: Detailed Feedback from Implementers

| Implementation                                                                                                                                                                                                   | Relationship types and number of occurrences                                                                                                                                                                                                                                                                                                                                 | Quantification of use                                                                                                                                                                                                                                         |
|------------------------------------------------------------------------------------------------------------------------------------------------------------------------------------------------------------------|------------------------------------------------------------------------------------------------------------------------------------------------------------------------------------------------------------------------------------------------------------------------------------------------------------------------------------------------------------------------------|---------------------------------------------------------------------------------------------------------------------------------------------------------------------------------------------------------------------------------------------------------------|
| <p>Implementation A</p> <p>Established in 2007, this implementation provides HIV care for adults and exposed children under 2, TB, hypertension, diabetes, mental health, epilepsy, and chronic lung disease</p> | <p>A total of 56,000 patients served by this implementation share the following relationships;</p> <p>Patient &lt;-&gt; Village Health Worker (1280)<br/>           Parent &lt;-&gt; Child (112)<br/>           Patient &lt;-&gt; Guardian (38)<br/>           (1430 combined)</p>                                                                                           | <p>Largely used for tracking the community health worker (CHW) assigned to each patient, mostly for lost to follow up tracking. Two implementation specific relationships linking children to guardian and patient to health worker have been introduced.</p> |
| <p>Implementation B</p> <p>Established in 2007, this implementation is focused on delivering HIV care.</p>                                                                                                       | <p>A total of 15,386 patients served by this implementation share the following relationships;</p> <p>CHW &lt;-&gt; Patient<br/>           Parent &lt;-&gt; Child<br/>           CHW supervisor &lt;-&gt; CHW<br/>           (9377 combined)</p>                                                                                                                             | <p>Largely used for tracking the CHW assigned to each patient, mostly for lost to follow up tracking. Other implementation specific relationships link CHW's to their supervisors.</p>                                                                        |
| <p>Implementation C</p> <p>Established in 2006, this implementation provides HIV, oncology care, and outpatient clinics for diabetes, asthma, heart failure, hypertension, and high-risk pediatric patients.</p> | <p>A total of 59,525 patients served by this implementation share the following relationships;</p> <p>Parent &lt;-&gt; Child (31057),<br/>           Accompagnateur &lt;-&gt; Patient (10753),<br/>           Mother &lt;-&gt; Child (991),<br/>           Accompagnateur Leader &lt;-&gt; Supervised Accompagnateur (171),<br/>           Spouse &lt;-&gt; Spouse (75),</p> | <p>Used to allow social workers or nurses to follow up with community health workers ("accompagnateurs") for tracking mother-child relationships for follow up visits after a HIV-positive pregnancy and birth.</p>                                           |

|                                                                                                                                                                                               |                                                                                                                                                                                                                                                                                                                                                                                                                                                               |                                                                                                                                                                                                 |
|-----------------------------------------------------------------------------------------------------------------------------------------------------------------------------------------------|---------------------------------------------------------------------------------------------------------------------------------------------------------------------------------------------------------------------------------------------------------------------------------------------------------------------------------------------------------------------------------------------------------------------------------------------------------------|-------------------------------------------------------------------------------------------------------------------------------------------------------------------------------------------------|
|                                                                                                                                                                                               | <p>Accompagnateur leader<br/> patient supervisor &lt;-&gt;<br/> Supervised Patient (17),<br/> Guardian (non-parent) &lt;-&gt;<br/> Child (16)<br/> (43,080 combined)</p>                                                                                                                                                                                                                                                                                      |                                                                                                                                                                                                 |
| <p>Implementation D</p>                                                                                                                                                                       | <p>Parent &lt;-&gt; Child (exact counts are unavailable, but estimated as thousands)</p>                                                                                                                                                                                                                                                                                                                                                                      | <p>Used primarily to link Pediatric patients to their mothers. In pediatric care, A connected system reads information about the child's mother to determine eligibility for discounts.</p>     |
| <p>Implementation E</p> <p>This unit has been in operation for many years. It has recently adapted EHR systems for data collection. It is the only care facility of its kind in Sri Lanka</p> | <p>Collects data on family relationships such as father &lt;-&gt; son, father &lt;-&gt; daughter, mother &lt;-&gt; son, mother &lt;-&gt; daughter.<br/> Exact counts are not available. (~200 combined)</p>                                                                                                                                                                                                                                                   | <p>Used by the human genetics unit to track family relationships in order to provide care for hereditary illnesses.</p>                                                                         |
| <p>Implementation F</p> <p>Established in 2006, this implementation specializes in providing long-term cancer care.</p>                                                                       | <p>A total of 791,481 patients served by this implementation share the following relationships;</p> <p>Parent &lt;-&gt; Child (96285), Spouse &lt;-&gt; Spouse (18408), Grandchild &lt;-&gt; Grandparent (9801), Guardian &lt;-&gt; Child (4437), Sibling &lt;-&gt; Sibling (2487), Aunt/Uncle &lt;-&gt; Niece/Nephew (1524), Child-in-law &lt;-&gt; Parent-in-law (805), Stepchild &lt;-&gt; Stepparent (530), Employee &lt;-&gt; Employer (390), Cousin</p> | <p>Used primarily for linking mothers to children. In addition, several other implementation specific relationships to identify a patient's family relationships have also been introduced.</p> |

|                  |                                                                                                                                                                                                                                                                                                                                                                                                                                                                                                  |                                                                                                                                                                                                                                       |
|------------------|--------------------------------------------------------------------------------------------------------------------------------------------------------------------------------------------------------------------------------------------------------------------------------------------------------------------------------------------------------------------------------------------------------------------------------------------------------------------------------------------------|---------------------------------------------------------------------------------------------------------------------------------------------------------------------------------------------------------------------------------------|
|                  | <-> Cousin (331), Friend <-> Friend (317), Foster Child <-> Foster Parent (191), Co-wife <-> Co-wife (54), Doctor <-> Patient (33), Caretaker <-> Patient (16)<br><br>(268,551 combined)                                                                                                                                                                                                                                                                                                         |                                                                                                                                                                                                                                       |
| Implementation G | Parent <-> Child (11656), Spouse <-> Spouse (3976), Grandchild <-> Grandparent (3529), Sibling <-> Sibling (1283), Aunt/Uncle <-> Niece/Nephew (940), Stepchild <-> Stepparent (474), Cousin <-> Cousin (442), Friend <-> Friend (353), Employee <-> Employer (173), Child-in-law <-> Parent-in-law (31), Foster Child <-> Foster Parent (18), Tenant/Renter <-> Landlord (13)<br><br>(228,888 total relationships records)<br>The total patient count for this implementation is not available. | Used primarily to link HIV discordant couples and mothers to children. In addition, several other implementation specific relationships to identify a patient's family relationships and social constructs have also been introduced. |
| Implementation H | Parent <-> Child (28919), Spouse <-> Spouse (9927), Grandchild <-> Grandparent (5166), Sibling <-> Sibling (1645), Aunt/Uncle <-> Niece/Nephew (1567), Friend <-> Friend (808), Cousin <-> Cousin (586), Employee <-> Employer (438), Stepchild <-                                                                                                                                                                                                                                               | Used primarily to link HIV discordant couples and mothers to children. In addition, several other implementation specific relationships to identify a patient's family relationships have also been introduced                        |

|                  |                                                                                                                                                                                                                                                                                                                                                                                                                                                                                                                                                                                   |                                                                                                                                                                                                                 |
|------------------|-----------------------------------------------------------------------------------------------------------------------------------------------------------------------------------------------------------------------------------------------------------------------------------------------------------------------------------------------------------------------------------------------------------------------------------------------------------------------------------------------------------------------------------------------------------------------------------|-----------------------------------------------------------------------------------------------------------------------------------------------------------------------------------------------------------------|
|                  | <p>&gt; Stepparent (417), Foster Child &lt;-&gt; Foster Parent (103), Child-in-law &lt;-&gt; Parent-in-law (6)</p> <p>(49,582 total relationships records)</p> <p>The total patient count for this implementation is not available.</p>                                                                                                                                                                                                                                                                                                                                           |                                                                                                                                                                                                                 |
| Implementation I | <p>Parent &lt;-&gt; Child (16902), Spouse &lt;-&gt; Spouse (5497), Grandchild &lt;-&gt; Grandparent (2274), Aunt/Uncle &lt;-&gt; Niece/Nephew (832), Sibling &lt;-&gt; Sibling (791), Friend &lt;-&gt; Friend (596), Cousin &lt;-&gt; Cousin (575), Employee &lt;-&gt; Employer (304), Stepchild &lt;-&gt; Stepparent (168), Tenant/Renter &lt;-&gt; Landlord (51), Foster Child &lt;-&gt; Foster Parent (22), Child-in-law &lt;-&gt; Parent-in-law (12)</p> <p>(28,024 total relationships records)</p> <p>The total patient count for this implementation is not available.</p> | Used primarily to link HIV discordant couples and mothers to children. In addition, several other implementation specific relationships to identify a patient's family relationships have also been introduced  |
| Implementation J | <p>Parent &lt;-&gt; Child (32684), Spouse &lt;-&gt; Spouse (8959), Grandchild &lt;-&gt; Grandparent (2553), Friend &lt;-&gt; Friend (1192), Sibling &lt;-&gt; Sibling (1020), Cousin &lt;-&gt; Cousin (936), Aunt/Uncle &lt;-&gt; Niece/Nephew (933),</p>                                                                                                                                                                                                                                                                                                                         | Used primarily to link HIV discordant couples and mothers to children. In addition, several other implementation specific relationships to identify a patient's family relationships have also been introduced. |

|                  |                                                                                                                                                                                                                                                                                                                                                                                                                                                                                                                                                                             |                                                                                                                                                                                                                 |
|------------------|-----------------------------------------------------------------------------------------------------------------------------------------------------------------------------------------------------------------------------------------------------------------------------------------------------------------------------------------------------------------------------------------------------------------------------------------------------------------------------------------------------------------------------------------------------------------------------|-----------------------------------------------------------------------------------------------------------------------------------------------------------------------------------------------------------------|
|                  | <p>Employee &lt;-&gt; Employer (681), Stepchild &lt;-&gt; Stepparent (226), Tenant/Renter &lt;-&gt; Landlord (80), Foster Child &lt;-&gt; Foster Parent (31), Child-in-law &lt;-&gt; Parent-in-law (14)</p> <p>(49,309 total relationships records)</p> <p>The total patient count for this implementation is not available.</p>                                                                                                                                                                                                                                            |                                                                                                                                                                                                                 |
| Implementation K | <p>Parent &lt;-&gt; Child (6525), Spouse &lt;-&gt; Spouse (1758), Grandchild &lt;-&gt; Grandparent (1030), Aunt/Uncle &lt;-&gt; Niece/Nephew (253), Sibling &lt;-&gt; Sibling (227), Employee &lt;-&gt; Employer (102), Stepchild &lt;-&gt; Stepparent (76), Cousin &lt;-&gt; Cousin (35), Friend &lt;-&gt; Friend (24), Foster Child &lt;-&gt; Foster Parent (12), Child-in-law &lt;-&gt; Parent-in-law (9), Tenant/Renter &lt;-&gt; Landlord (1)</p> <p>(10,052 total relationships records)</p> <p>The total patient count for this implementation is not available.</p> | Used primarily to link HIV discordant couples and mothers to children. In addition, several other implementation specific relationships to identify a patient's family relationships have also been introduced. |
